# Requirement of Functional *Ethylene-Insensitive 2* Gene for Efficient Resistance of *Arabidopsis* to Infection by *Botrytis cinerea*<sup>1</sup>

Bart P.H.J. Thomma, Kristel Eggermont, Koenraad F.M.-J. Tierens, and Willem F. Broekaert\*

F.A. Janssens Laboratory of Genetics, Katholieke Universiteit Leuven, K. Mercierlaan 92, B-3001 Heverlee-Leuven, Belgium

Inoculation of wild-type *Arabidopsis* plants with the fungus *Alternaria brassicicola* results in systemic induction of genes encoding a plant defensin (*PDF1.2*), a basic chitinase (*PR-3*), and an acidic hevein-like protein (*PR-4*). Pathogen-induced induction of these three genes is almost completely abolished in the ethylene-insensitive *Arabidopsis* mutant *ein2-1*. This indicates that a functional ethylene signal transduction component (*EIN2*) is required in this response. The *ein2-1* mutants were found to be markedly more susceptible than wild-type plants to infection by two different strains of the gray mold fungus *Botrytis cinerea*. In contrast, no increased fungal colonization of *ein2-1* mutants was observed after challenge with avirulent strains of either *Peronospora parasitica* or *A. brassicicola*. Our data support the conclusion that ethylene-controlled responses play a role in resistance of *Arabidopsis* to some but not all types of pathogens.

Ethylene is a gaseous plant hormone that has been implicated in a range of physiological processes including seed germination, organ senescence, organ abscission, fruit ripening, and morphological responses of organs (Abeles et al., 1992). It has been proposed that ethylene also plays an important role in controlling defense responses of plants to microbial pathogens. Pathogen challenge often causes an increase in ethylene production (Ross and Williamson, 1951; Van Loon, 1977; Mauch et al., 1984; Boller, 1991; Penninckx et al., 1998). Moreover, exogenous application of ethylene to plants can result in the activation of genes encoding antimicrobial pathogenesis-related (PR) proteins (Boller et al., 1983; Mauch and Staehelin, 1989; Memelink et al., 1990; Eyal et al., 1992; Beffa et al., 1995; Penninckx et al., 1996; Knoester et al., 1998), cell wall-strengthening Hyp-rich glycoproteins (Esquerré-Tugayé et al., 1979; Ecker and Davis, 1987; Tagu et al., 1992), or enzymes involved in the synthesis of phenylpropanoids (Ecker and Davis, 1987).

If ethylene plays a crucial role in plant defense mechanisms, one would predict that treatment of plants with

exogenous ethylene would enhance resistance to subsequent challenge with microorganisms or, conversely, that treatment with ethylene inhibitors would adversely affect their resistance level. This has been demonstrated for a number of plant-pathogen interactions (Esquerré-Tugayé et al., 1979; El-Kazzaz et al., 1983a; Marte et al., 1993). However, for other plant-pathogen combinations, pretreatment with ethylene either had no effect on resistance or actually diminished the resistance level (El-Kazzaz et al., 1983b; Brown and Lee, 1993; Van Loon and Pennings, 1993). These contradictory results have made the role of ethylene in host defense a frequently debated matter of controversy.

Recently, however, conclusive evidence has been presented that ethylene is indeed involved in host resistance, albeit only to particular classes of pathogens and not to others, thus reconciling previous conflicting data (Knoester et al., 1998; Hoffman et al., 1999). In their experiments, Knoester et al. (1998) made use of transgenic tobacco plants transformed with a dominant-negative mutant allele of the *Arabidopsis* ethylene receptor gene *ETR1*. The transgenic plants with a disrupted ethylene response were more susceptible than wild-type plants to normally nonpathogenic soil-borne *Pythium* spp., whereas their level of resistance to tobacco mosaic virus was unaffected. Hoffman et al. (1999) found that some soybean mutants with reduced ethylene sensitivity had a tendency toward more severe symptoms compared with wild-type plants when challenged with virulent strains of the fungi *Septoria glycines* and *Rhizoctonia solani* and some but not all avirulent strains of *Phytophthora sojae*.

On the other hand, some of the ethylene-insensitive soybean mutants showed less-severe chlorotic symptoms relative to their wild-type parents upon inoculation with virulent strains of *Pseudomonas syringae* pv *glycinea*. Less-severe chlorosis was also observed in the ethylene-insensitive *Never ripe* tomato strain compared with wild-type plants when inoculated with either *Xanthomonas campestris* pv *vesicatoria* or *Pseudomonas syringae* pv *tomato*. In addition, the *Never ripe* tomato mutants also showed less-severe wilting symptoms upon challenge with the fungal vascular pathogen *Fusarium oxysporum* f. sp. *lycopersici* (Lund et al., 1998). Ethylene is known to promote events such as chlorophyll degradation (Stall and Hall, 1984) and xylem occlusion (VanderMolen et al., 1983), which are positively correlated with severity of disease symptoms such as chlorosis and wilting, respec-

<sup>1</sup>This research was partially supported by a grant (no. G0218.97) from the Fonds voor Wetenschappelijk Onderzoek-Vlaanderen. B.P.H.J.T. is research assistant of this fund. K.T. is the recipient of a predoctoral fellowship of the Vlaams Instituut voor Bevordering van het Wetenschappelijk-Technologisch Onderzoek in de Industrie.

\* Corresponding author; e-mail willem.broekaert@agr.kuleuven.ac.be; fax 32-16-321966.

tively. In conclusion, it appears that ethylene controls both disease resistance responses and symptom expression. Therefore, this hormone can influence particular plant-pathogen interactions in different ways, depending on the offensive strategies of the pathogen, the efficacy of the defense genes it controls, and the nature of the physiological reactions that are triggered by the pathogen.

Although most of our current highly detailed knowledge on the process of ethylene perception and signal transduction comes from the study of Arabidopsis mutants (Kieber, 1997; McGrath and Ecker, 1998), the role of ethylene in the resistance of this plant to microbial pathogens has so far only been examined in a handful of cases. Bent et al. (1992) studied the interaction between Arabidopsis and the phytopathogenic bacteria *Xanthomonas campestris* pv *campestris* and *Ps. syringae* pv *tomato*. They observed that mutant *ein2-1*, a mutant affected in a membrane-associated signal transduction component of the ethylene response (McGrath and Ecker, 1998), showed less macroscopically visible chlorosis and less chlorophyll degradation compared with wild-type plants. However, when the bacteria multiplying in *ein2-1* and wild-type plants were counted, no significant difference was found. It therefore appears that ethylene does not play a role in actual resistance to these bacteria but, rather, in the development of pathogen-induced chlorosis symptoms.

Suppression of chlorotic disease symptoms after challenge with these bacteria was not observed for the ethylene-insensitive mutant *etr1-3* (Bent et al., 1992), which is affected in the *ETR1* gene encoding an ethylene receptor (Chang et al., 1993). This result is apparently difficult to reconcile with the supposed role of ethylene in chlorotic symptom development. However, when testing alongside the allelic mutants *etr1-1* and *etr1-3* for their ability to induce *PDF1.2* in response to challenge with *Alternaria brassicicola*, Penninckx et al. (1998) observed that *etr1-3* is a very leaky allele in contrast to *etr1-1*, at least with respect to its impact on this pathogen-induced response in adult plants. Therefore, the observation that the *etr1-3* mutation does not affect bacterially induced symptom development may well be due to leakiness of this allele. When the *etr1-1* and the *ein2-1* mutants were tested for susceptibility to the Oomycete *Peronospora parasitica* strain Noco, a strain that is virulent on the wild-type parental line Columbia (Col-0), no differences in susceptibility relative to wild-type plants were observed (Lawton et al., 1994).

Inoculation of leaves of wild-type plants with an avirulent *Ps. syringae* pv *tomato* strain was found to trigger a systemic defense response that protected the leaves against subsequent inoculation with either virulent strains of *P. parasitica* or *Ps. syringae* pv *tomato* (Lawton et al., 1995; Pieterse et al., 1998). This systemic response was equally effective in the ethylene-insensitive *etr1-1* mutant (Lawton et al., 1995; Pieterse et al., 1998). On the other hand, Pieterse et al. (1998) observed that inoculating Arabidopsis roots with a nonpathogenic root-colonizing strain of *Pseudomonas fluorescens* conferred systemic resistance in wild-type plants but not *etr1-1* mutants to subsequent inoculation of the leaves with a virulent *Ps. syringae* pv *tomato* strain. Therefore, a systemic resistance response triggered by leaf

inoculation with an avirulent bacterium appears to be ethylene independent, while that induced by inoculating roots with a nonpathogenic bacterium is ethylene dependent. So far, however, no pathogens of Arabidopsis have been described for which ethylene plays a role in local resistance responses.

One complication in the study of the role of ethylene in disease resistance is that there appears to be an interrelationship with another stress hormone, jasmonate. Our previous studies on the expression of Arabidopsis gene *PDF1.2*, encoding an antifungal plant defensin peptide, have shown that this gene can be activated systemically upon pathogen challenge and that this activation requires both functional components of the ethylene response pathway, including *ETR1* and *EIN2*, and the jasmonate response pathway, including *COI1* (Penninckx et al., 1996). Both hormone response pathways need to be triggered concomitantly in order for pathogen-induced activation of *PDF1.2* to occur (Penninckx et al., 1998). On the other hand, activation of *PDF1.2* is independent of the salicylate response pathway (Penninckx et al., 1996), which controls pathogen-induced expression of other antimicrobial proteins such as PR-1, PR-2, and PR-5 (Uknes et al., 1992). When assessing the role of jasmonate in disease resistance, we observed that a jasmonate-insensitive mutant, *coi1-1*, showed enhanced disease susceptibility to the fungal pathogens *A. brassicicola* and *Botrytis cinerea*, but not to *P. parasitica*, whereas the opposite resistance responses were observed for the salicylate response mutant *npr1-1* and the salicylate degrading transgenic line *NahG* (Thomma et al., 1998). The main objectives of the current study were to assess the effect of a mutation in the ethylene transduction gene *EIN2* on the resistance response to the above-mentioned pathogens and the induction of some PR genes.

## MATERIALS AND METHODS

### Biological Material and Plant Inoculations

The mutant *ein2-1* (Guzmán and Ecker, 1990) was obtained from the Arabidopsis Biological Resource Center (Columbus, OH). The Arabidopsis mutants *coi1-1* (Feys et al., 1994), *npr1-1* (Cao et al., 1994), and *pad3-1* (Glazebrook and Ausubel, 1994) were obtained from Drs. J. Turner (University of East Anglia, Norwich, UK), X. Dong (Duke University, Durham, NC), and J. Glazebrook (University of Maryland, College Park), respectively. All of these mutants are derived from the Col-0 ecotype. Arabidopsis plants were essentially grown as described previously (Penninckx et al., 1996).

Growth and spore harvesting of the fungi *Alternaria brassicicola* (strain MUCL20297; Mycothèque Université Catholique de Louvain, Louvain-la-Neuve, Belgium), *Botrytis cinerea* (strains IMI169558, International Mycology Institute, Kew, UK; and MUCL30158, Mycothèque Université Catholique de Louvain) were done as described previously (Broekaert et al., 1990). The transgenic *A. brassicicola* strain (MUCL20297) containing a chimeric GUS-expressing transgene is described in Thomma et al. (1998). *Peronospora parasitica* strain Wela (Delaney et al., 1994) was maintained

on living Arabidopsis plants of the Weiningen ecotype, and was kindly provided by Drs. R. Vogelsang and A. Slusarenko (Rheinisch-Westfälische Technischetochschule Aachen, Germany).

Inoculation of 4-week-old soil-grown Arabidopsis plants with *A. brassicicola*, *B. cinerea*, and *P. parasitica* was performed as described previously (Thomma et al., 1998). For inoculation with *A. brassicicola* and *B. cinerea*, care was taken to place drops with inoculum on fixed positions left and right from the midvein.

### Detection of Fungi in Inoculated Plants

A transgenic *A. brassicicola* strain containing a chimeric *Uida* (GUS) expressing transgene driven by a constitutive glyceraldehyde-3-P dehydrogenase promoter was used for quantifying fungal biomass in inoculated plants. Plants were inoculated with three 5- $\mu$ L drops per leaf of a suspension in water of  $5 \times 10^5$  conidial spores of this strain per milliliter. Inoculated plants were incubated at 100% RH. Quantification of fungal biomass was performed as described previously (Thomma et al., 1998), using a quantitative RNA dot-blot assay with *Uida* as a probe. The presence of *P. parasitica* in inoculated plants was detected by microscopic observation of leaves stained with lactophenol trypan blue as described by Mauch-Mani and Slusarenko (1996).

### RNA Gel-Blot Analysis

RNA was extracted from tissues of Arabidopsis by the phenol-LiCl method according to the method of Eggermont et al. (1996). RNA gel-blot analysis was performed as described previously (Penninckx et al., 1996). Riboprobes for *PDF1.2*, *PR-3*, *PR-4*, and  $\beta$ -*Tubulin 1* were synthesized as described previously (Penninckx et al., 1996; Thomma et al., 1998).

### Ethylene and Methyl Jasmonate Treatments

For testing the protective effect on Arabidopsis plants of ethylene against *A. brassicicola*, 4-week-old soil-grown *pad3-1* plants were placed in a gastight translucent chamber. Ethylene was applied by injecting the appropriate amount of ethylene gas with a syringe through a rubber septum in the chamber. Methyl jasmonate was applied by pipeting an appropriate amount of 1% (v/v) liquid methyl jasmonate in ethanol on a cotton plug inside the chamber. After 48 h of treatment, the chambers were opened and the plants were inoculated with either *A. brassicicola* or *B. cinerea* as described above, except that for *B. cinerea* inoculation only one inoculation spot per leaf was applied. Six days after inoculation, infections were analyzed macroscopically by measuring lesion diameters (for *A. brassicicola*-inoculated plants) or by counting the ratio of inoculated leaves showing spreading necrosis versus total amount of inoculated leaves (for *B. cinerea*-inoculated plants).

## RESULTS

### Requirement of EIN2 for Pathogen-Induced Expression of *PR-3* and *PR-4*

The Arabidopsis genes encoding the plant defensin *PDF1.2*, basic *PR-3*-type chitinase (also called ChitB), and the basic *PR-4* protein (also called hevein-like protein or Hel) have all been shown previously to be inducible by exogenous application of ethylene (Samac et al., 1990; Potter et al., 1993; Chen and Bleecker, 1995; Penninckx et al., 1996), as well as by methyl jasmonate (Thomma et al., 1998). Pathogen-induced expression of all of these genes is known to require a functional jasmonate response pathway, as expression of these genes is abolished in the *coi1-1* mutant (Thomma et al., 1998), whereas requirement of a functional ethylene response pathway for pathogen-induced expression has so far only been demonstrated for *PDF1.2* (Penninckx et al., 1996, 1998). We now show that the expression of both *PR-3* and *PR-4* is, like that of *PDF1.2*, severely reduced in *A. brassicicola*-inoculated leaves of the ethylene-insensitive mutant *ein2-1* compared with similarly treated leaves of wild-type (Col-0) plants (Fig. 1). In noninoculated leaves of *A. brassicicola*-inoculated wild-type plants, systemic induction was clearly observed for *PDF1.2*, *PR-3*, and *PR-4* genes, but this response was completely abolished in the *ein2-1* mutants (Fig. 1). These results indicate that functional EIN2 and COI1 (Thomma et al., 1998) are required for pathogen-induced expression of *PDF1.2*, *PR-3*, and *PR-4*, suggesting that these genes are controlled by a similar jasmonate/ethylene-dependent signal transduction pathway.

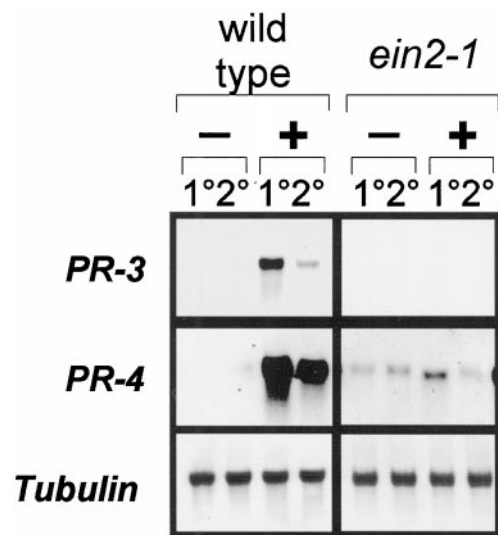

**Figure 1.** Induction of the PR genes in Arabidopsis in response to infection with *A. brassicicola*. Four-week-old soil-grown wild-type (Col-0) and *ein2-1* plants were infected with *A. brassicicola* and harvested 48 h following treatment. RNA blots were hybridized with the various probes indicated on the left. Symbols on top of the lanes are as follows: -, Mock-inoculated with water; +, inoculated with *A. brassicicola* spore suspension; 1°, treated lower rosette leaves; 2°, untreated upper rosette leaves.

### Requirement of EIN2 for Resistance to Particular Fungi

Thomma et al. (1998) have previously shown that the jasmonate-insensitive *Arabidopsis* mutant *coi1-1* is more susceptible than wild-type plants to infection by the fungi *B. cinerea* strain IMI169558 and *A. brassicicola* strain MUCL20297, but not by the Oomycete *P. parasitica* strain Wela. To investigate whether the ethylene-insensitive *ein2-1* mutant shares the same defects in disease resistance as the *coi1-1* mutant, the *ein2-1* mutants were challenged with these three different fungal pathogens under the same conditions described in Thomma et al. (1998). All of these tests were performed on 4-week-old plants.

Strain IMI169558 of the gray mold fungus *B. cinerea* did not cause any single case of complete plant decay among 60 inoculated wild-type plants. In contrast, 42% of the inoculated *ein2-1* plants were completely macerated by this strain over a 16-d period following inoculation (Fig. 2). *B. cinerea* strain MUCL30158, which was apparently more aggressive than strain IMI169558, caused decay of 9% and 100% of the inoculated wild-type and *ein2-1* plants, respectively, within 16 d (Fig. 2). Therefore, *ein2-1* mutants are more susceptible than wild-type plants to infection by either of two different strains of *B. cinerea*, which is in line

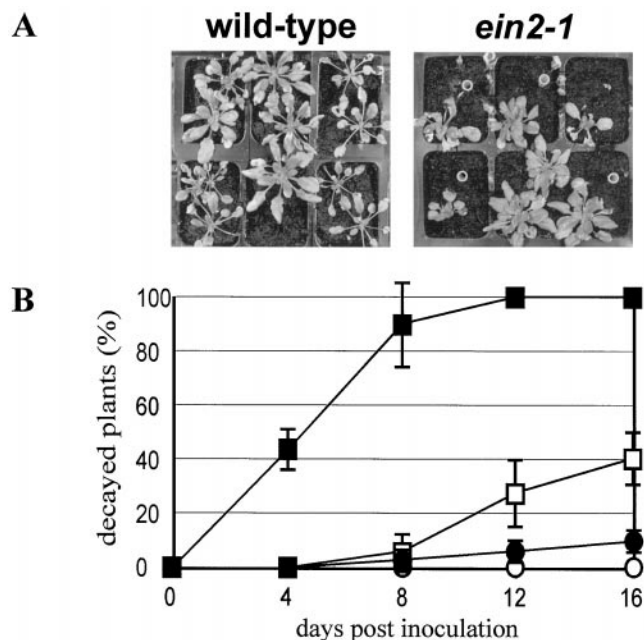

**Figure 2.** Disease development on *Arabidopsis* inoculated with *B. cinerea*. A, Four-week-old *Arabidopsis* plants were drop-inoculated with *B. cinerea* strain IMI169558, and photographs were taken 12 d later. Circles (heads of pipet tips) indicate positions of completely decayed plants. B, Decay of *Arabidopsis* plants drop-inoculated with *B. cinerea* strains IMI169558 and MUCL30158. The percentage of dead plants is expressed as a function of time after inoculation. Plants were considered dead when their hearts were completely rotten. Data represent averages  $\pm$  SE of three different experiments performed with 20 plants per genotype. Circles, Wild-type (Col-0) plants; squares, the mutant *ein2-1*; white symbols, plants inoculated with strain IMI169558; black symbols, plants inoculated with strain MUCL30158.

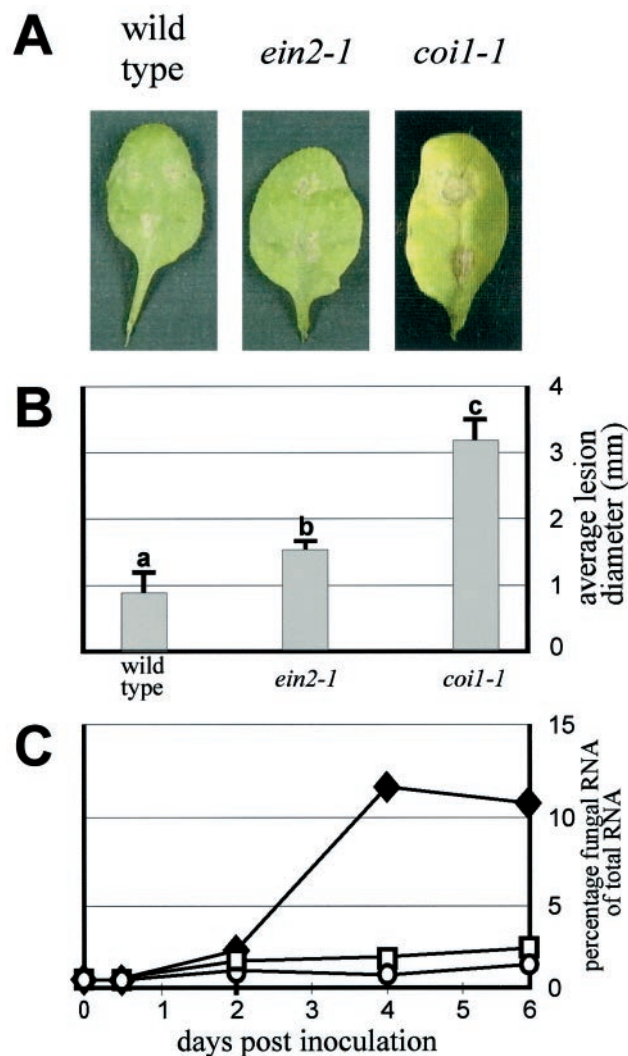

**Figure 3.** Disease development on *Arabidopsis* inoculated with *A. brassicicola*. A, Necrotic lesions on leaves of 4-week-old *Arabidopsis* wild-type (Col-0), *ein2-1*, and *coi1-1* plants drop-inoculated with spores of *A. brassicicola*. B, Average diameter of lesions formed after 6 d on 4-week-old *Arabidopsis* plants inoculated with a spore suspension of *A. brassicicola*. Data points represent averages  $\pm$  SE of measurements from 60 lesions on 15 different plants. Bars with different letter labels indicate that the corresponding data are significantly different ( $P > 0.95$ ) according to Tukey's studentized range test (Neter et al., 1996). C, Percentage fungal RNA of total RNA in infection sites at different times after inoculation of leaves with *A. brassicicola*. Data points represent measurements on RNA extracted from 30 leaf discs.  $\circ$ , Col-0;  $\square$ , *ein2-1*; and  $\blacklozenge$ , *coi1-1*. The experiment was repeated twice with similar results.

with the observations made for the jasmonate-insensitive mutant *coi1-1*.

When challenged with *A. brassicicola* strain MUCL20297, the *ein2-1* mutant produced restricted necrosis symptoms indicative of an incompatible interaction (Fig. 3A). The necrotic lesions formed on *A. brassicicola*-inoculated *ein2-1* plants had an average diameter that was about 2-fold higher compared with the diameter of lesions on wild-type plants (Fig. 3B). However, measurements of fungal bio-

mass in the infected zones by hybridization of RNA dot blots with a fungus-specific probe did not reveal increased colonization of *ein2-1* plants by *A. brassicicola* compared with wild-type plants (Fig. 3C). In contrast, inoculation of the jasmonate-insensitive *coi1-1* mutant with *A. brassicicola* yielded spreading lesions with markedly enhanced fungal colonization (Fig. 3; Thomma et al., 1998). Therefore, *ein2-1* does not respond in the same way as *coi1-1* to this particular fungus.

*P. parasitica* strain Wela has previously been shown to be avirulent on Arabidopsis Col-0 wild-type plants and on the jasmonate-insensitive mutant *coi1-1*, whereas Arabidopsis lines showing a defect in the salicylate-dependent defense pathway (*NahG* and *npr1-1*) were found to be susceptible to infection by this pathogen (Delaney et al., 1994; Thomma et al., 1998). When *ein2-1* plants were challenged with *P. parasitica* strain Wela, a fully incompatible interaction was observed (Fig. 4). No intercellularly growing hyphae or oospores could be detected in any of 20 *ein2-1* leaf samples analyzed under the microscope. In contrast, *npr1-1* plants subjected to the same treatment showed an abundance of intercellularly growing hyphae and oospores (Fig. 4). This indicates that the ethylene response pathway is, unlike the salicylate response pathway, not implicated in the resistance of wild-type plants to an avirulent *P. parasitica* strain. Previous work established that Arabidopsis mutants affected in the ethylene-response pathway (*etr1-1*, *ein2-1*) do not show enhanced disease susceptibility relative to wild-type Col-0 plants to the virulent *P. parasitica* strain Noco (Lawton et al., 1994).

#### Protection against *A. brassicicola* and *B. cinerea* by Ethylene and Methyl Jasmonate Pretreatment

The remarkable susceptibility to the fungus *B. cinerea* of the ethylene-insensitive *ein2-1* mutant (Fig. 2) and the jasmonate-insensitive *coi1-1* mutant (Thomma et al., 1998) suggests that ethylene- and jasmonate-dependent pathogen-inducible effector molecules contribute to resistance

against this pathogen. Based on these observations, one would expect that increased production of such effector molecules prior to infection attempts by *B. cinerea* would enhance the resistance level to this pathogen. To test this prediction, wild-type Col-0 plants were placed for 2 d in airtight chambers containing either air or air supplemented with 0.5, 5.0, or 50  $\mu\text{L L}^{-1}$  ethylene or 150 nM methyl jasmonate, whereafter plants were inoculated with *B. cinerea*. The number of leaves showing soft rot symptoms was reduced by 57% in plants pretreated with 50  $\mu\text{L L}^{-1}$  ethylene, while pretreatment with 150 nM methyl jasmonate reduced the number of leaves showing soft rot symptoms by 80% (Fig. 5A).

In contrast, pretreatment of *ein2-1* plants with 50  $\mu\text{L L}^{-1}$  ethylene did not reduce the disease incidence (Fig. 5B), indicating that the events causing protection in ethylene-treated wild-type plants are indeed dependent on a functional ethylene-response pathway. Pretreatment of *ein2-1* plants with methyl jasmonate, on the other hand, still caused a reduction of the disease incidence by 64% (Fig. 5B). Similar experiments were also performed using *A. brassicicola* as a pathogen. In this case, however, wild-type Col-0 plants could not be used because *A. brassicicola* causes highly restricted, non-spreading lesions on this genotype. Instead, the *pad3-1* mutant was used in these experiments. The *pad3-1* mutant is deficient in an enzyme involved in the biosynthesis of camalexin (Glazebrook and Ausubel, 1994; N. Zhou and J. Glazebrook, personal communication), an antimicrobial metabolite that is an important determinant for resistance to *A. brassicicola* (Thomma et al., 1999). Previous work certified that ethylene- and jasmonate-dependent defense responses are still fully operative in the *pad3-1* mutant (Thomma et al., 1999). Pretreatment of this mutant with 0.5, 5.0, or 50  $\mu\text{L L}^{-1}$  ethylene in the atmosphere for 2 d prior to inoculation failed to confer any protection against *A. brassicicola* (Fig. 5C). In contrast, pretreatment of the plants with 150 nM gaseous methyl jasmonate reduced the average lesion diameter by 80% (Fig. 5C).

#### DISCUSSION

The results presented here confirm that Arabidopsis possesses a jasmonate/ethylene-dependent pathway for the induction of a particular subset of PR genes, including a plant defensin gene (*PDF1.2*), a basic chitinase gene (*PR-3*), and a hevein-like gene (*PR-4*). The involvement of both ethylene and jasmonate in this pathway is based on the observations that *PDF1.2*, *PR-3*, and *PR-4* can be activated by exogenous treatment with either methyl jasmonate (Thomma et al., 1998) or ethylene (Samac et al., 1990; Potter et al., 1993; Penninckx et al., 1996; B.P.H.J. Thomma, unpublished results), while they are not or very weakly induced by exogenous application of salicylic acid (Thomma et al., 1998). Moreover, induction of this set of genes upon challenge of Arabidopsis plants with the fungus *A. brassicicola* is largely abolished in a mutant (*coi1-1*; Thomma et al., 1998) affected in the *COI1* gene, a gene encoding a signal transduction component of the jasmonate response (Xie et al., 1998). We have now shown that *A. brassicicola*-induced

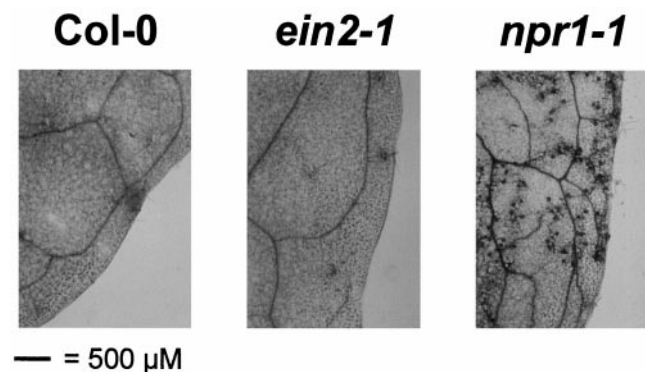

**Figure 4.** Disease development on Arabidopsis inoculated with *P. parasitica*. Microscopic view of leaves of 4-week-old Arabidopsis wild-type (Col-0), *ein2-1*, and *npr1-1* plants spray-inoculated with conidiospores of *P. parasitica* strain Wela. Eleven days after inoculation, inoculated leaves were stained with lactophenol trypan blue prior to microscopic examination. Leaves of the *npr1-1* mutant reveal the presence of intracellular hyphae and oospores.

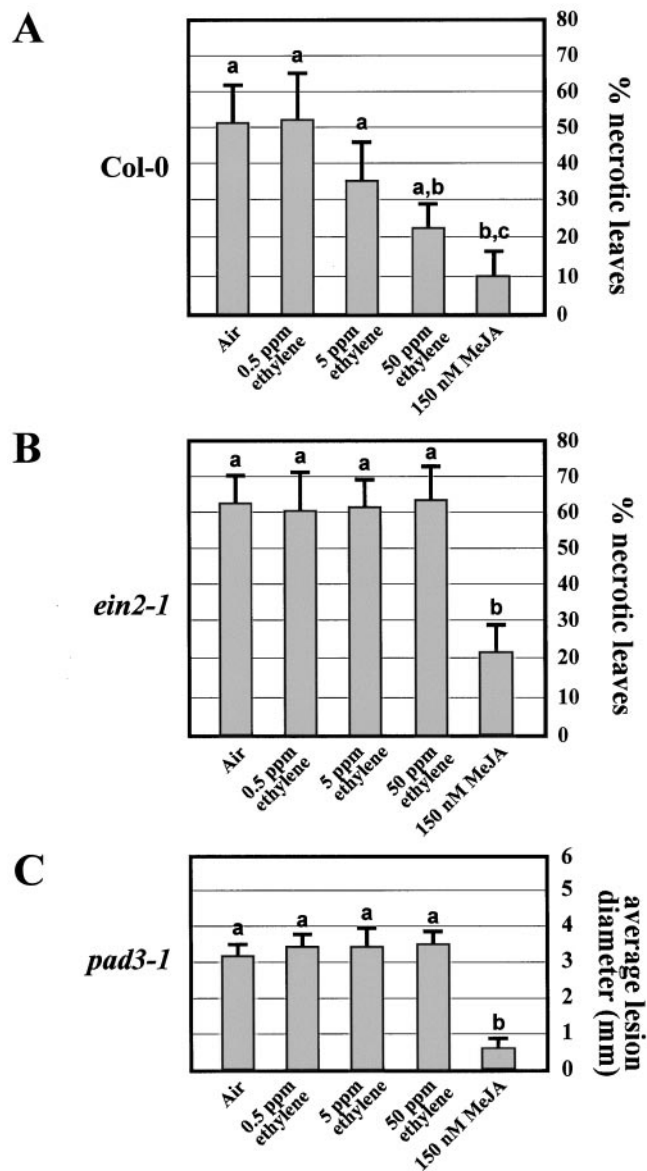

**Figure 5.** Protective effect of exogenously applied ethylene and methyl jasmonate on infection by *B. cinerea* strain MUCL30158 and *A. brassicicola*. A, Percentage of inoculated leaves showing spreading necrosis symptoms 6 d after inoculation of Arabidopsis wild-type (Col-0) plants with a spore suspension of *B. cinerea*. Prior to inoculation, separate sets of plants were placed for 48 h in gastight translucent chambers with an atmosphere containing the gaseous compounds as indicated below the bars. Data points represent averages  $\pm$  SE of seven series of inoculations on 16 leaves from two plants. Bars with different letter labels indicate that the corresponding data are significantly different ( $P > 0.95$ ) according to Tukey's studentized range test (Neter et al., 1996). B, Percentage of inoculated leaves showing spreading necrosis symptoms 6 d after inoculation of Arabidopsis *ein2-1* plants with a spore suspension of *B. cinerea*. Specifications are as in the legend to A. C, Average diameter of lesions formed after 6 d on 4-week-old Arabidopsis *pad3-1* mutants inoculated with a spore suspension of *A. brassicicola*. Prior to inoculation, separate sets of plants were placed for 48 h in gastight translucent chambers with an atmosphere containing the gaseous compounds as indicated below the bars. Data points represent averages  $\pm$  SE of measurements from 40 lesions on 10 different

expression of these genes is also dramatically reduced in an ethylene-insensitive mutant (*ein2-1*) with a dysfunctional *EIN2* gene encoding a membrane-associated signal transduction component of the ethylene response (McGrath and Ecker, 1998). Therefore, we consider *PDF1.2*, *PR-3*, and *PR-4* as a class of co-regulated jasmonate/ethylene-dependent PR-genes whose regulation is clearly distinct from that of the salicylate-dependent PR-genes such as *PR-1*, *PR-2*, and *PR-5* (Uknes et al., 1992; Cao et al., 1994; Delaney et al., 1994).

The occurrence of two subsets of differentially regulated PR-genes has also been demonstrated in tobacco. The genes encoding extracellular isoforms such as acidic PR-1, acidic  $\beta$ -1,3-glucanase, and acidic chitinase are efficiently induced by salicylic acid but less so by ethylene (Memelink et al., 1990; Ohshima et al., 1990; Ward et al., 1991). Pathogen-induced activation of these genes is abolished in a transgenic line expressing the salicylate-degrading *NahG* gene (Gaffney et al., 1993). Another subset of PR genes, those encoding vacuolar PR proteins such as basic PR-1, basic  $\beta$ -1,3-glucanase, and basic chitinase, are more efficiently induced by ethylene than by salicylate (Memelink et al., 1990; Eyal et al., 1992; Beffa et al., 1995) and their pathogen-induced expression is down-regulated in transgenic tobacco plants expressing a dominant-negative mutant form of the Arabidopsis ethylene receptor *ETR1* (Knoester et al., 1998). The role of jasmonate in the induction of the latter subset of PR genes has not yet been intensively studied, but Niki et al. (1998) recently reported that these genes can be induced by floating tobacco leaf discs on a jasmonate-containing solution. Therefore, a jasmonate/ethylene-dependent pathway for induction of particular PR genes also appears to be operative in tobacco.

Arabidopsis *PDF1.2* and *PR-3* have previously been purified and shown to possess antifungal activity in vitro (Verburg and Huynh, 1991; Penninckx et al., 1996). Arabidopsis *PR-4*, on the other hand, has not yet been isolated, but it is known to be highly homologous to CBP-20, a tobacco PR protein with proven antifungal properties (Ponstein et al., 1994). *PDF1.2*, *PR-3*, and *PR-4* are therefore likely to contribute to the defensive capacity of Arabidopsis plants directed against fungal organisms.

Our results clearly show that the *ein2-1* mutation in Arabidopsis entails markedly enhanced susceptibility to at least two different strains of the pathogenic fungus *B. cinerea* (Fig. 2). On the other hand, the *ein2-1* mutation had no impact on either resistance to an avirulent strain of *A. brassicicola* (Fig. 3) or to an avirulent or a virulent strain of *P. parasitica* (Fig. 4 and Lawton et al., 1994, respectively). This is in line with the data obtained by Knoester et al. (1998) on ethylene-insensitive tobacco plants that were more susceptible than control plants to soil-borne *Pythium* spp. but not to tobacco mosaic virus.

The *ein2-1* mutation in Arabidopsis results in a lack of pathogen-inducible expression of a subset of PR genes

plants. Bars with different letter labels indicate that the corresponding data are significantly different ( $P > 0.95$ ) according to Tukey's studentized range test (Neter et al., 1996). MeJA, Methyl jasmonate.

(Penninckx et al., 1996; Fig. 1), as does expression of a dominant-negative mutant *ETR1* gene in tobacco (Knoester et al., 1998). However, these observations by themselves do not prove that such PR proteins are responsible for the control of particular pathogens. Ethylene insensitivity is likely to have pleiotropic effects, which would therefore affect the expression of other effector molecules as well. It is conceivable that such ethylene-controlled effector events are effective at controlling particular pathogens but have no effect on others.

The data in the present study indicate that necrotrophic pathogens (e.g. *B. cinerea* in the case of Arabidopsis or *Pythium* spp. in the case of tobacco) are among those that are effectively contained by ethylene-controlled effector molecules, whereas biotrophic pathogens (e.g. *P. parasitica* in the case of Arabidopsis and tobacco mosaic virus in the case of tobacco) are more efficiently countered by other defense mechanisms, including salicylate-controlled effector events. However, this may be a matter of coincidence and at the present time, it is more cautious not to speculate beyond the observation that some pathogens are kept in check by ethylene-controlled effector events while others are not.

Both the Arabidopsis *ein2-1* and *coi1-1* mutants are more susceptible than wild-type plants to *B. cinerea* (Fig. 2; Thomma et al., 1998), although *coi1-1* is more susceptible than *ein2-1* in comparative assays (B.P.H.J. Thomma, unpublished results). In addition, a jasmonate-deficient mutant (*fad3/fad7/fad8*), a jasmonate-insensitive mutant (*jar1*) of Arabidopsis, and ethylene-insensitive tobacco plants are more susceptible than their respective control lines to soil-borne *Pythium* spp. (Knoester et al., 1998; Staswick et al., 1998; Vijayan et al., 1998). This may be seen as an additional argument for the involvement of jasmonate/ethylene-dependent PR genes in resistance against these pathogens, as expression of jasmonate/ethylene-dependent PR genes depends on both ethylene and jasmonate signal response pathways. Consistent with this notion we found that treatment of Arabidopsis plants with either methyl jasmonate or ethylene, both of which increase the levels of jasmonate/ethylene-dependent PR proteins, resulted in enhanced protection to *B. cinerea*. On the other hand, neither *ein2-1* nor *coi1-1* Arabidopsis mutants were more susceptible to *P. parasitica* (Fig. 4; Lawton et al., 1994; Thomma et al., 1998), excluding a role for jasmonate/ethylene-dependent PR genes in resistance against this pathogen.

One interesting observation was that the *coi1-1* and *ein2-1* mutants differed in their response to challenge by *A. brassicicola*. The *coi1-1* mutant showed enhanced tissue colonization by this fungus relative to wild-type plants (Thomma et al., 1998), while the *ein2-1* mutant did not (Fig. 3). The most likely explanation for these results is that the jasmonate/ethylene-dependent PR genes are not effective or are only very marginally effective against this fungus, while a presumed jasmonate-dependent/ethylene-independent effector molecule may contribute much more effectively. The fact that the camalexin-deficient *pad3-1* mutant is also more susceptible to *A. brassicicola* compared with wild-type plants suggests that this hypo-

thetical effector molecule might be camalexin, the major Arabidopsis phytoalexin. However, camalexin production is not induced by treatment with jasmonate (Thomma et al., 1999), so we believe the hypothetical effector molecule to be different from camalexin. Consistent with the presumed existence of a jasmonate-inducible yet ethylene-independent effector molecule, we observed that treatment of *pad3-1* mutants with methyl jasmonate increased the level of resistance to *A. brassicicola*, whereas pretreatment with ethylene failed to do so (Fig. 5). The jasmonate-inducible yet ethylene-independent effectors may also be effective against *B. cinerea*, as inferred from the observation that the *ein2-1* mutant can be protected against this fungus by pretreatment with methyl jasmonate but not by ethylene (Fig. 5).

A full range of pathogens are now available for future research that either cause less-severe symptoms on ethylene-insensitive versus ethylene-sensitive Arabidopsis genotypes (*Ps. syringae* and *X. campestris*, Bent et al., 1992), no or weak differences in symptoms or multiplication (*A. brassicicola* and *P. parasitica*, this study; Lawton et al., 1994), or more severe symptoms and increased multiplication (*B. cinerea*, this study). These data provide strong support to the notion that ethylene can play a balanced role in mounting disease resistance responses as well as in aggravation of disease symptoms, the outcome of which is dependent on the nature of the pathogen.

#### ACKNOWLEDGMENTS

The authors thank Drs. J. Turner, X. Dong, and J. Glazebrook for providing the mutants *coi1-1*, *npr1-1*, and *pad3-1*, respectively. The authors also thank Drs. R. Vogelsang and A. Slusarenko for providing *P. parasitica* strain Wela.

Received May 20, 1999; accepted August 9, 1999.

#### LITERATURE CITED

- Abeles FB, Morgan PW, Salveit ME Jr (1992) Ethylene in Plant Biology, Ed 2. Academic Press, San Diego
- Beffa R, Szell M, Meuwly P, Pay A, Vögeli-Lange R, Métraux J-P, Neuhaus G, Meins F, Nagy F (1995) Cholera toxin elevates pathogen resistance and induces pathogenesis-related gene expression in tobacco. *EMBO J* 14: 5753–5761
- Bent AF, Innes RW, Ecker JR, Staskawicz BJ (1992) Disease development in ethylene-insensitive *Arabidopsis thaliana* infected with virulent and avirulent *Pseudomonas* and *Xanthomonas* pathogens. *Mol Plant-Microbe Interact* 5: 372–378
- Boller T (1991) Ethylene in pathogenesis and disease resistance. In AK Mattoo, JC Suttle, eds, *The Plant Hormone Ethylene*. CRC Press, Boca Raton, FL, pp 293–314
- Boller T, Gehri A, Mauch F, Vögeli U (1983) Chitinase in bean leaves: induction by ethylene, purification, properties, and possible function. *Planta* 157: 22–31
- Broekaert WF, Terras FRG, Cammue BPA, Vanderleyden J (1990) An automated quantitative assay for fungal growth. *FEMS Microbiol Lett* 69: 55–60
- Brown GE, Lee HS (1993) Interaction of ethylene with citrus stem-end rot caused by *Diplodia natalensis*. *Phytopathology* 83: 1204–1208

- Cao H, Bowling SA, Gordon AS, Dong X (1994) Characterization of an *Arabidopsis* mutant that is non-responsive to inducers of systemic acquired resistance. *Plant Cell* **6**: 1583–1592
- Chang C, Kwok SF, Bleecker AB, Meyerowitz EM (1993) *Arabidopsis* ethylene-response gene *etr1*: similarity of product to two-component regulators. *Science* **262**: 539–544
- Chen QG, Bleecker AB (1995) Analysis of ethylene signal-transduction kinetics associated with seedling-growth responses and chitinase induction in wild-type and mutant *Arabidopsis*. *Plant Physiol* **108**: 597–607
- Delaney TP, Uknes S, Vernooij B, Friedrich L, Weymann K, Negrotto D, Gaffney T, Gut-Rella M, Kessmann H, Ward E, Ryals J (1994) A central role of salicylic acid in plant disease resistance. *Science* **266**: 1247–1250
- Ecker JR, Davis RW (1987) Plant defense genes are regulated by ethylene. *Proc Natl Acad Sci USA* **84**: 5202–5206
- Eggermont K, Goderis IJ, Broekaert WF (1996) High-throughput RNA extraction from plant samples based on homogenisation by reciprocal shaking in the presence of a mixture of sand and glass beads. *Plant Mol Biol Rep* **14**: 273–279
- El-Kazzaz MK, Chordas A, Kader AA (1983a) Physiological and compositional changes in orange fruit in relation to modification of their susceptibility to *Penicillium italicum* by ethylene treatments. *J Am Soc Hortic Sci* **108**: 618–622
- El-Kazzaz MK, Sommer NF, Fortlage RJ (1983b) Effects of different atmospheres on postharvest decay and quality of fresh strawberries. *Phytopathology* **73**: 282–285
- Esquerré-Tugayé MT, Lafitte C, Mazau D, Toppan A, Touze A (1979) Cell surfaces in plant-microorganism interactions. II. Evidence for the accumulation of hydroxyproline-rich glycoproteins in the cell wall of diseased plants as a defense mechanism. *Plant Physiol* **64**: 320–326
- Eyal Y, Sagee O, Fluhr R (1992) Dark-induced accumulation of a basic pathogenesis-related (PR-1) transcript and a light requirement for its induction by ethylene. *Plant Mol Biol* **19**: 589–599
- Feys BJF, Benedetti CE, Penfold CN, Turner JG (1994) *Arabidopsis* mutants selected for resistance to the phytotoxin coronatine are male sterile, insensitive to methyl jasmonate, and resistant to a bacterial pathogen. *Plant Cell* **6**: 751–759
- Gaffney T, Friedrich L, Vernooij B, Negrotto D, Nye G, Uknes S, Ward E, Kessman H, Ryals J (1993) Requirement of salicylic acid for the induction of systemic acquired resistance. *Science* **261**: 754–756
- Glazebrook J, Ausubel FM (1994) Isolation of phytoalexin-deficient mutants of *Arabidopsis thaliana* and characterization of their interactions with bacterial pathogens. *Proc Natl Acad Sci USA* **91**: 8955–8959
- Guzmán P, Ecker JR (1990) Exploiting the triple response of *Arabidopsis* to identify ethylene-related mutants. *Plant Cell* **2**: 513–523
- Hoffman T, Schmidt JS, Zheng X, Bent A (1999) Isolation of ethylene-insensitive soybean mutants that are altered in pathogen susceptibility and gene-for-gene disease resistance. *Plant Physiol* **119**: 935–949
- Kieber JJ (1997) The ethylene response pathway in *Arabidopsis*. *Annu Rev Plant Physiol Plant Mol Biol* **48**: 277–296
- Knoester M, Van Loon LC, Van Den Heuvel J, Hennig J, Bol JF, Linthorst HJM (1998) Ethylene-insensitive tobacco lacks non-host resistance against soil-borne fungi. *Proc Natl Acad Sci USA* **95**: 1933–1937
- Lawton KA, Potter SL, Uknes S, Ryals J (1994) Acquired resistance signal transduction in *Arabidopsis* is ethylene independent. *Plant Cell* **6**: 581–588
- Lawton KA, Weymann K, Friedrich L, Vernooij B, Uknes S, Ryals J (1995) Systemic acquired resistance in *Arabidopsis* requires salicylic acid but not ethylene. *Mol Plant-Microbe Interact* **8**: 863–870
- Lund ST, Stall RE, Klee HJ (1998) Ethylene regulates the susceptible response to pathogen infection in tomato. *Plant Cell* **10**: 371–382
- Marte M, Buonauro R, Dellatorre G (1993) Induction of systemic resistance to tobacco powdery mildew by tobacco mosaic virus, tobacco necrosis virus or ethephon. *J Phytopathol* **138**: 137–144
- Mauch F, Hadwiger LA, Boller T (1984) Ethylene: symptom, not signal for the induction of chitinase and  $\beta$ -1,3-glucanase in pea pods by pathogens and elicitor. *Plant Physiol* **76**: 607–611
- Mauch F, Staehelin LA (1989) Functional implications of the sub-cellular localization of ethylene-induced chitinase and  $\beta$ -1,3-glucanase in bean leaves. *Plant Cell* **1**: 447–457
- Mauch-Mani B, Slusarenko AJ (1996) Production of salicylic acid precursors is a major function of phenylalanine ammonia-lyase in the resistance of *Arabidopsis* to *Peronospora parasitica*. *Plant Cell* **8**: 203–212
- McGrath RB, Ecker JR (1998) Ethylene signalling in *Arabidopsis*: events from the membrane to the nucleus. *Plant Physiol Biochem* **36**: 103–113
- Memelink J, Linthorst HJM, Schilperoort RA, Hoge JHCD (1990) Tobacco genes encoding acidic and basic isoforms of pathogenesis-related proteins display different expression patterns. *Plant Mol Biol* **14**: 119–126
- Neter J, Kutner MH, Nachtsheim CJ, Wasserman W (1996) *Applied Linear Statistical Models*, Ed 4. WCB/McGraw-Hill, Boston
- Niki T, Mitsuhashi I, Seo S, Ohtsubo N, Ohashi Y (1998) Antagonistic effect of salicylic acid and jasmonic acid on the expression of pathogenesis-related (PR) protein genes in wounded mature tobacco leaves. *Plant Cell Physiol* **39**: 500–507
- Ohshima M, Itoh H, Matsuoka M, Murakami T, Ohashi Y (1990) Analysis of stress-induced or salicylic acid-induced expression of the pathogenesis-related 1a protein gene in transgenic tobacco. *Plant Cell* **2**: 95–106
- Penninckx IAMA, Eggermont K, Terras FRG, Thomma BPHJ, De Samblanx GW, Buchala A, Métraux J-P, Manners JM, Broekaert WF (1996) Pathogen-induced systemic activation of a plant defensin gene in *Arabidopsis* follows a salicylic acid-independent pathway. *Plant Cell* **8**: 2309–2323
- Penninckx IAMA, Thomma BPHJ, Buchala A, Métraux J-P, Broekaert WF (1998) Cooperative activation of jasmonate and ethylene response pathways in parallel is required for induction of a plant defensin gene in *Arabidopsis*. *Plant Cell* **10**: 2103–2114
- Pieterse CMJ, Van Wees SCM, Van Pelt JA, Knoester M, Laan R, Gerrits H, Weisbeek PJ, Van Loon LC (1998) A novel signaling pathway controlling induced systemic resistance in *Arabidopsis*. *Plant Cell* **10**: 1571–1586
- Ponstein AS, Bres-Vloemans SA, Sela-Buurlage MB, Van Den Elzen PJM, Melchers LS, Cornelissen BJC (1994) A novel pathogen- and wound-inducible tobacco (*Nicotiana tabacum*) protein with antifungal activity. *Plant Physiol* **104**: 109–118
- Potter S, Uknes S, Lawton K, Winter AM, Chandler D, Dimaio J, Novitzky R, Ward E, Ryals J (1993) Regulation of a hevein-like protein in *Arabidopsis*. *Mol Plant-Microbe Interact* **6**: 680–681
- Ross AF, Williamson CE (1951) Physiologically active emanations from virus-infected plants. *Phytopathology* **41**: 431–438
- Samac DA, Hironaka CM, Yallaly PE, Shah DM (1990) Isolation and characterization of the genes encoding basic and acidic chitinase in *Arabidopsis thaliana*. *Plant Physiol* **93**: 907–914
- Stall RE, Hall CB (1984) Chlorosis and ethylene production in pepper leaves infected with *Xanthomonas campestris* pv *vesicatoria*. *Phytopathology* **74**: 373–375
- Staswick PE, Yuen GY, Lehman CC (1998) Jasmonate signalling mutants of *Arabidopsis* are susceptible to the soil fungus *Pythium irregulare*. *Plant J* **15**: 747–754
- Tagu D, Walker N, Ruiz-Avila L, Burgess S, Martínez-Izquierdo JA, Leguay JJ, Netter P, Puigdomènech P (1992) Regulation of the maize HRGP gene expression by ethylene and wounding mRNA accumulation and qualitative expression analysis of the promoter by microprojectile bombardment. *Plant Mol Biol* **20**: 529–538
- Thomma BPHJ, Eggermont K, Penninckx IAMA, Mauch-Mani B, Vogelsang R, Cammue BPA, Broekaert WF (1998) Separate



- jasmonate-dependent and salicylate-dependent defense response pathways in Arabidopsis are essential for resistance to distinct microbial pathogens. *Proc Natl Acad Sci USA* **95**: 15107–15111
- Thomma BPHJ, Nelissen I, Eggermont K, Broekaert WF** (1999) Deficiency in phytoalexin production causes enhanced susceptibility of *Arabidopsis thaliana* to the fungus *Alternaria brassicicola*. *Plant J* **19**: 163–171
- Uknes S, Mauch-Mani B, Moyer M, Potter S, Williams S, Dincher S, Chandler D, Slusarenko A, Ward E, Ryals J** (1992) Acquired resistance in Arabidopsis. *Plant Cell* **4**: 645–656
- Van Loon LC** (1977) Induction by 2-chloroethylphosphonic acid of viral-like lesions, associated proteins, and systemic resistance in tobacco. *Virology* **80**: 417–420
- Van Loon LC, Pennings GGH** (1993) Involvement of ethylene in the induction of systemic acquired resistance in tobacco. In B Fritig, M Legrand, eds, *Mechanisms of Plant Defense Responses*. Kluwer Academic Publishers, Dordrecht, The Netherlands, pp 156–159
- VanderMolen GE, Labavitch JM, Strand LL, DeVay JE** (1983) Pathogen-induced vascular gels: ethylene as a host intermediate. *Physiol Plant* **59**: 573–580
- Verburg JG, Huynh QK** (1991) Purification and characterization of an antifungal chitinase from *Arabidopsis thaliana*. *Plant Physiol* **95**: 450–455
- Vijayan P, Shockey J, Levesque CA, Cook RJ, Browse J** (1998) A role for jasmonate in pathogen defense of Arabidopsis. *Proc Natl Acad Sci USA* **95**: 7209–7214
- Ward ER, Uknes SJ, Williams SC, Dincher SS, Wiederhold DL, Alexander DC, Ahl-Goy P, Métraux J-P, Ryals JA** (1991) Coordinate gene activity in response to agents that induce systemic acquired resistance. *Plant Cell* **3**: 1085–1094
- Xie DX, Feys BF, James S, Nieto-Rostro M, Turner JG** (1998) *COI1*: an Arabidopsis gene required for jasmonate-regulated defense and fertility. *Science* **280**: 1091–1094
